# Supplementary material for: Design and Testing of a Multi-Hazard Risk Rapid Assessment Questionnaire for Hill Communities in the Indian Himalayan Region
Source: Copernicus journal article supplement (doi:10.5194/nhess-2022-91), 2022-04-26
Supplement: Supplementary file [file nhess-2022-91-AC2-supplement.pdf]

## Response to Referee#2

### Comment (R2)-1:

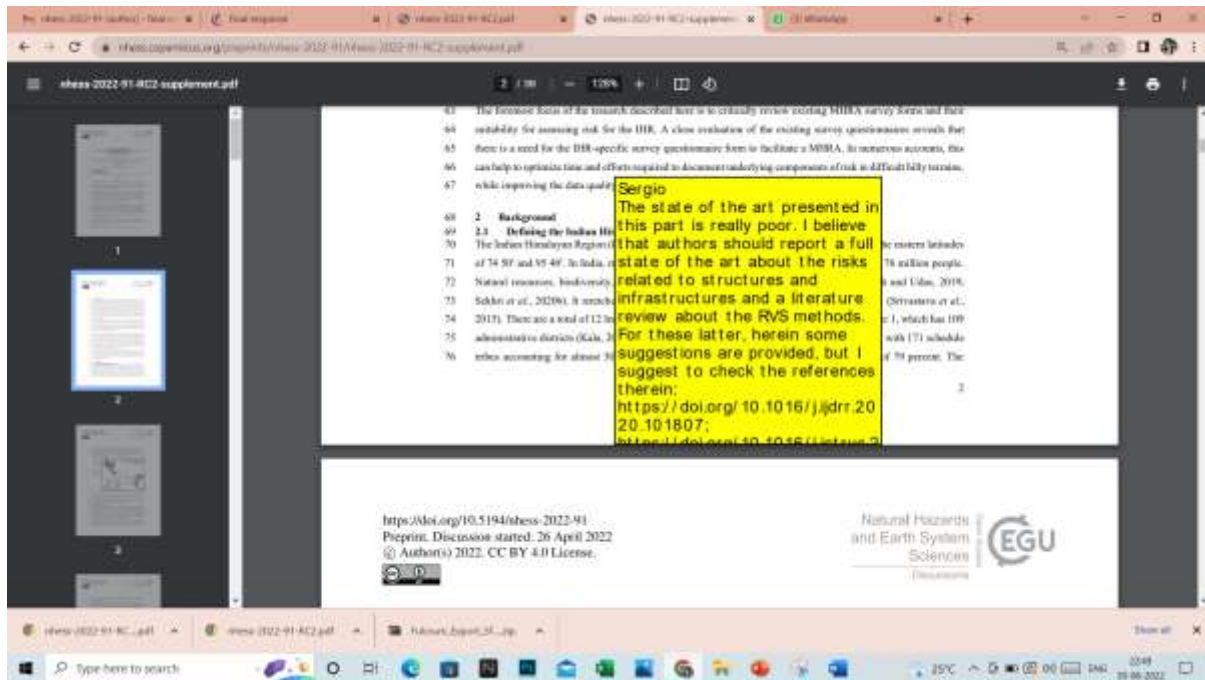

**Response:** We appreciate the reviewer's insightful suggestion. Taking this comment into consideration, we have modified the Introduction part in section 1 of the manuscript. However, Literature on RVS has already been mentioned in section 3.3.2. of the manuscript.

### Comment (R2)-2: Please ensure high quality figure 1 to 5

**Response:** We thank the reviewer's for highlighting this point and accordingly, we have replaced all the figures (identified by referee-Figure 1 to 5) with high quality pixels. We will send the figures in separate files.

**Comment (R2)-3:**

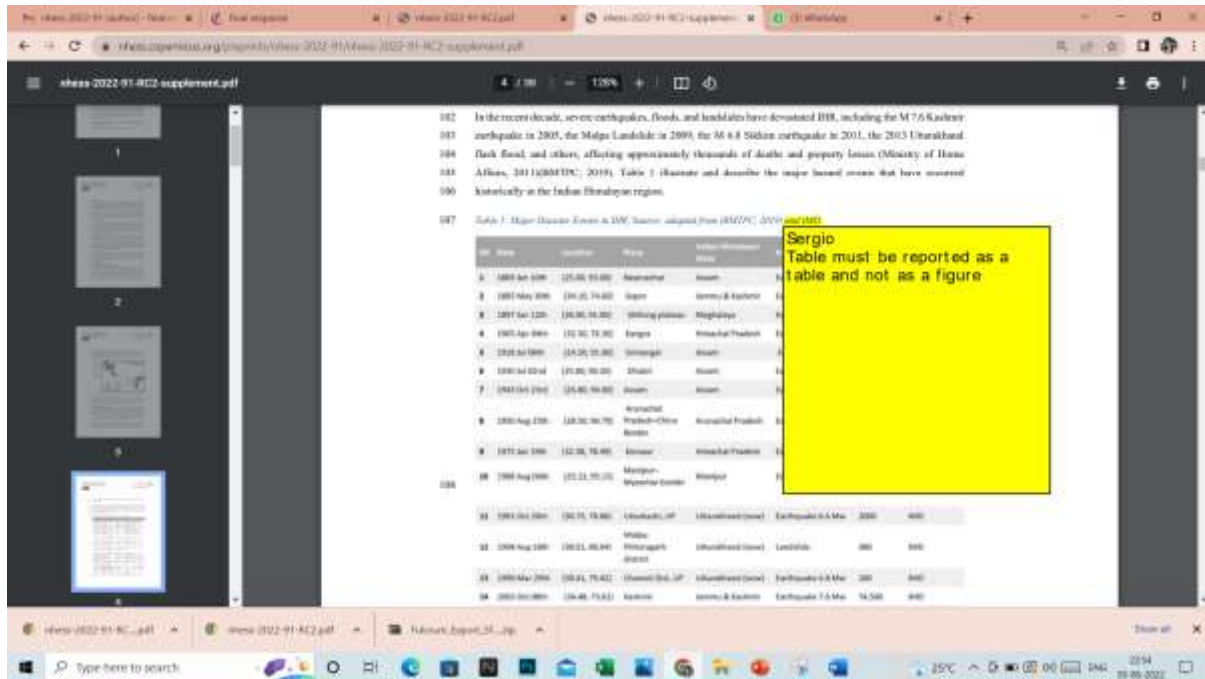

**Response:** We appreciate the reviewer’s insightful suggestion; accordingly, we have updated the Table 1.

**Comment (R2)-4:**

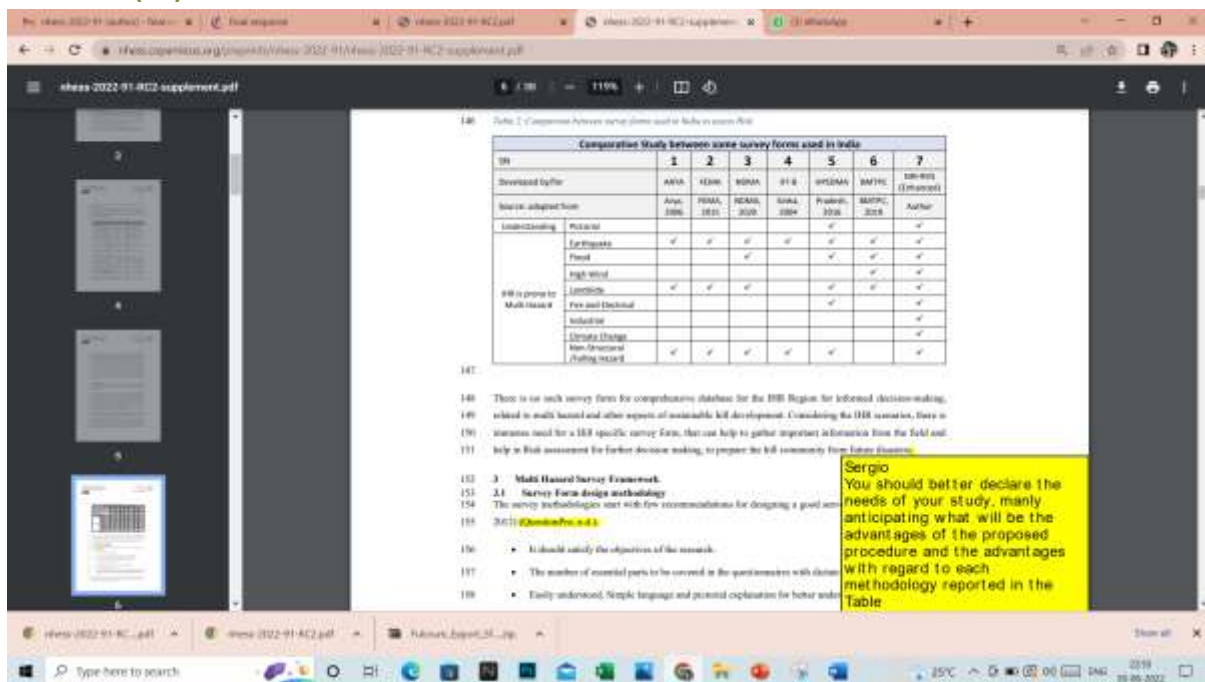

**Response:** We have refined the need of the study in section 2.3. However, advantage of the proposed procedure is already mention in section 5.2 of the manuscript.

**Comment (R2)-5:**

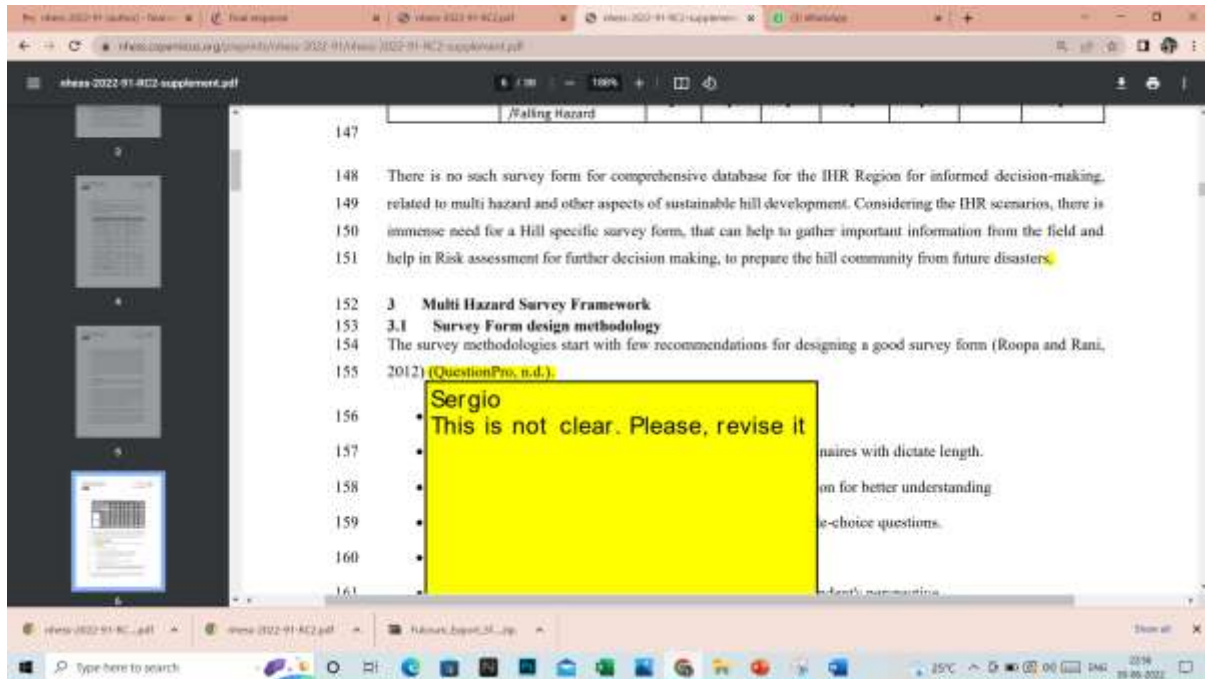

**Response:** We have revised the design methodology in Section 3.1 and detailed the overall methodology adopted in section 3.2 and figure 2 of the manuscript for better clarity.

**Comment (R2)-6:**

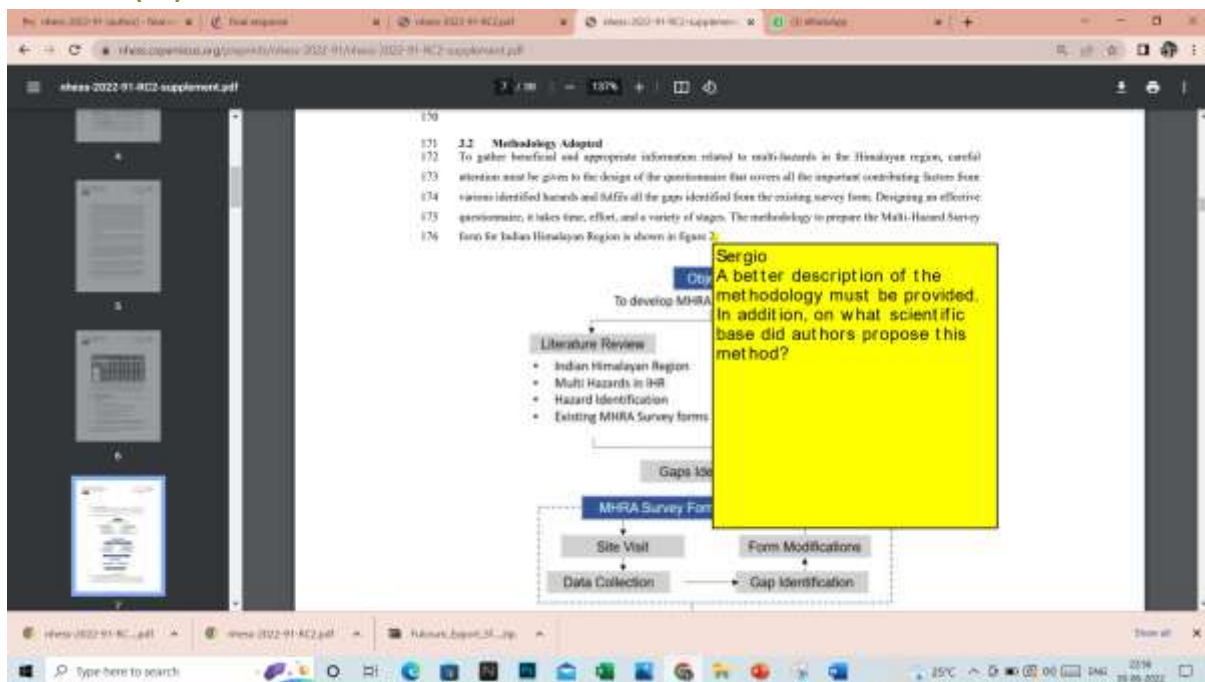

**Response:** We greatly appreciate the reviewer’s thoughtful suggestion. Taking this comment into consideration, we have revised the methodology in section 3.2 and figure 2. We have also detailed it for better understanding and clarity on the overall methodology adoption.

**Comment (R2)-7:**

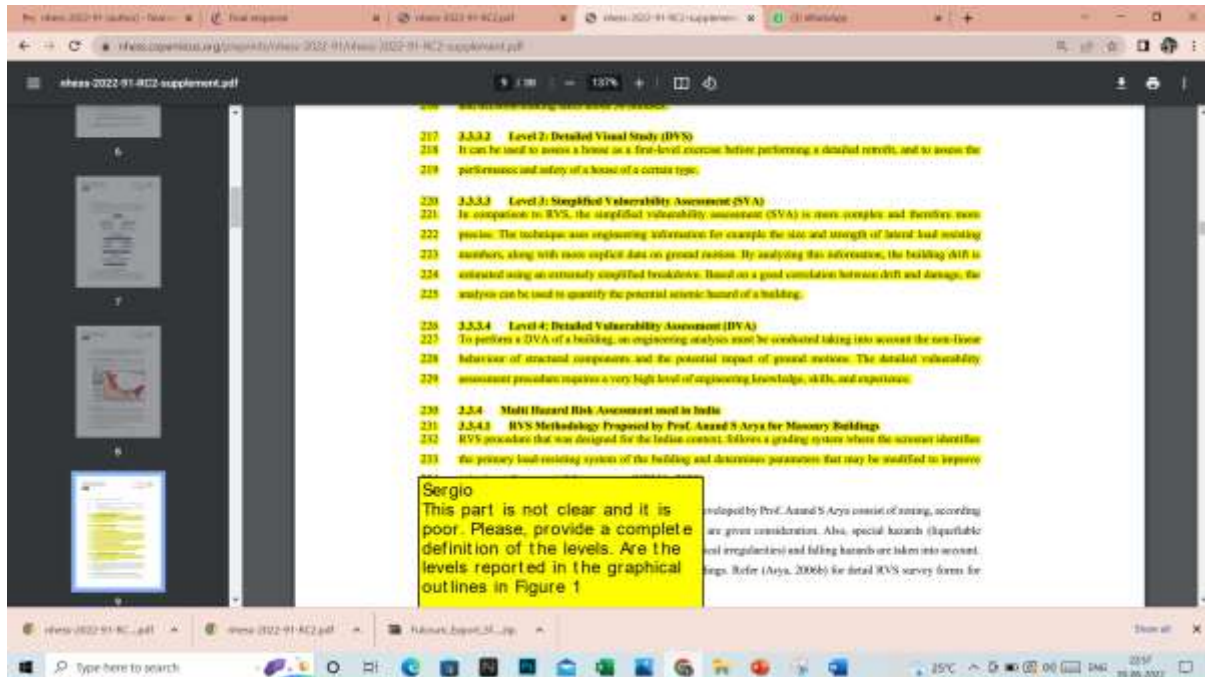

**Response:** We have revised the section 3.3.3 and incorporated it in the methodology figure 2.

**Comment (R2)-8:**

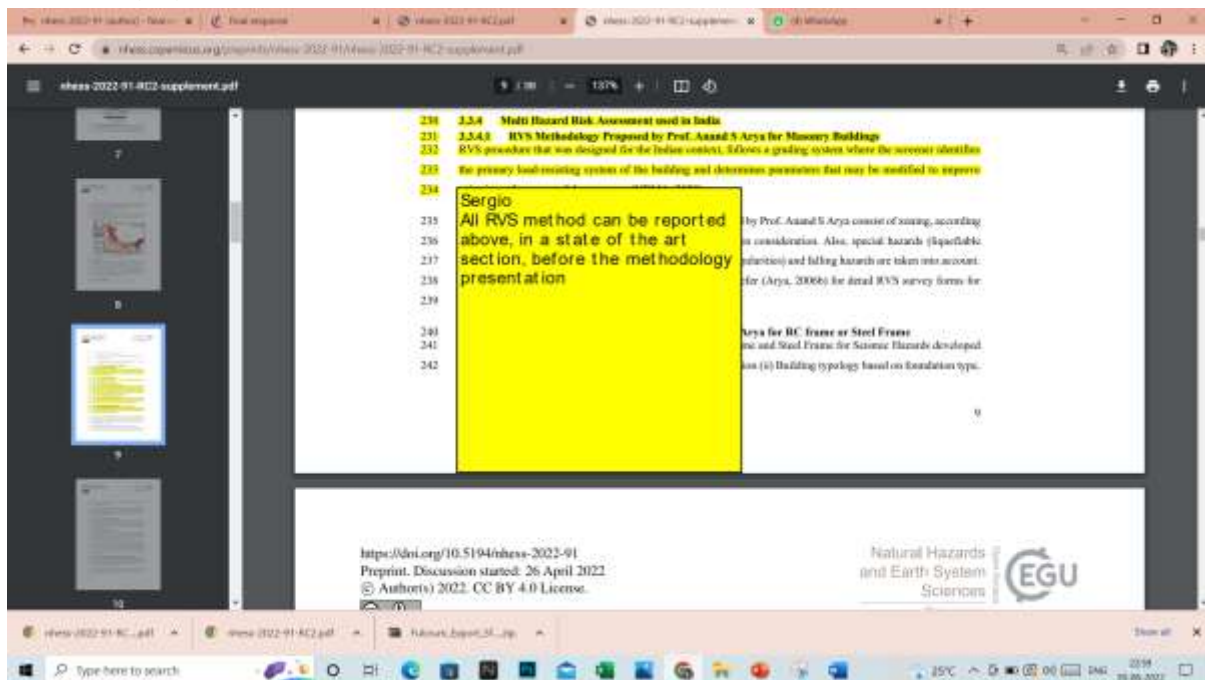

**Response:** We appreciate the reviewer's thoughtful suggestion. However, considering the structure of the manuscript, after a thorough discussion, we are continuing the flow of the structure as before, i.e. to combine all information related to literature reviews in section 3.3 of the manuscript, including information about RVS.

### Comment (R2)-9:

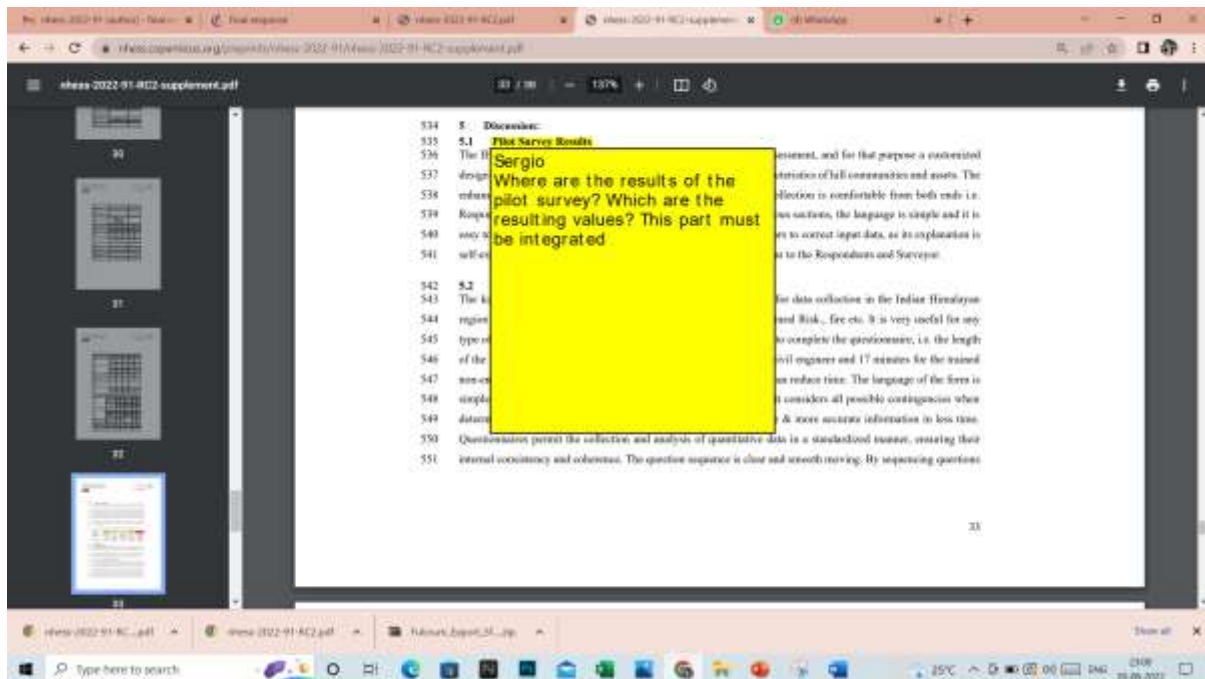

**Response:** We greatly appreciate the reviewer's thoughtful suggestion (which will definitely enhance our work) and we agree with it. Taking this comment into consideration, we have added Pilot Survey of 10 schools and its results in section 4.5 and discussion about its result in section 5.3 of the manuscript.

### Comment (R2)-10:

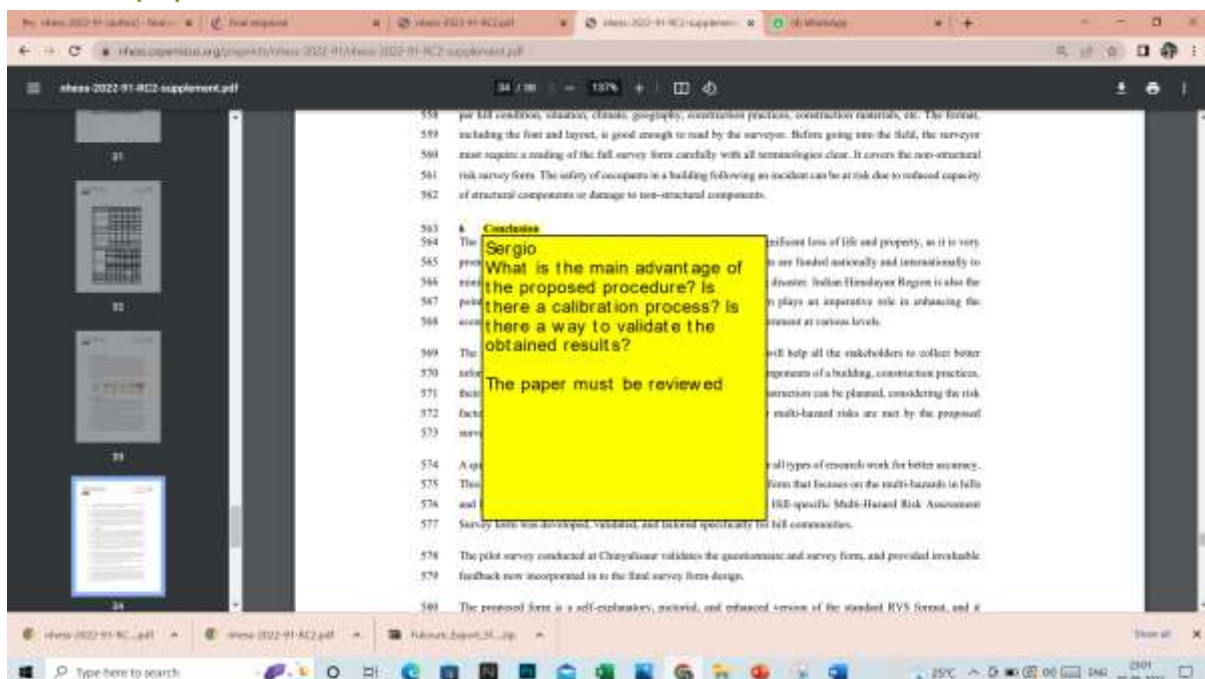

**Response:** Taking this comment into consideration, we have revised the conclusion part.

We would like to thank the referees once again for taking the time to examine our manuscript. Our manuscript quality has been enhanced by your comments and suggestions.
